# Supplementary material for: “Like–Likes–Like” strategy for the design of electron transport materials and emitters with facilitated interlayer electron transport and improved efficiency
Source: Royal Society of Chemistry journal article supplement (doi:10.1039/d1tc04850c), 2022-01-01
Supplement: d1tc04850c1.pdf [file d1tc04850c1.pdf]

## Supporting Information

### “Like-Likes-Like” strategy for the design of electron transport materials and emitters with facilitated interlayer electron transport and improved efficiency

Yibing Wu,<sup>a</sup> Rui Lin<sup>a</sup>, Mudassir Iqbal<sup>b</sup>, Yaocheng Jin<sup>c</sup>, Yanping Huo<sup>c</sup> and Xinhua Ouyang<sup>a\*</sup>

#### 1. The equation of Lippert-Matage

$$v_f = \frac{2\mu_e(\mu_e - \mu_g)}{4\pi\epsilon_0 hca^3} \Delta f + C \quad (1)$$

$$\Delta f = \frac{\epsilon - 1}{2\epsilon + 1} - \frac{0.5(n^2 - 1)}{2n^2 + 1} \quad (2)$$

$$a = \left(\frac{3M}{4N\pi d}\right)^{\frac{1}{3}} \quad (3)$$

where  $\mu_g$  is the ground-state dipole moment,  $a$  is the solvent cavity (Onsager) radius, which was derived from Avogadro's number ( $N$ ), molecular weight ( $M$ ), and density ( $d = 1$ ), and  $\epsilon$ ,  $\epsilon_0$ , and  $n$  are the solvent dielectric constant, vacuum permittivity, and solvent refractive index, respectively.

#### 2. Electron-only device study

Electron-only devices were fabricated for the studies of electron mobility by using space charge limited current (SCLC) method. The device structure is ITO/Al (100 nm)/PTB7:PC<sub>71</sub>BM (100 nm)/Ca (20 nm) /Al and ITO/ Al/PTB7:PC<sub>71</sub>BM (100 nm)/MSAPBS ( $x$  nm) /Al.

The SCLC is described by modified Mott-Gurney's law<sup>3</sup>:

$$J = (9/8)\epsilon_0\epsilon_r\mu(V^2/d^3)\exp[0.89\beta(V/d)^{0.5}]$$

We can get the following formula:

$$\ln(Jd^3/V^2) \approx 0.89\beta(V/d)^{0.5} + \ln(9\epsilon_0\epsilon_r\mu/8)$$

The results are plotted as  $\ln(Jd^3/V^2)$  versus  $(V/d)^{0.5}$ , as shown in Figure S8.  $J$  stands for current density,  $d$  is the thickness of the active layer,  $V$  is the applied potential,  $\epsilon_r$  is the relative

dielectric constant of the blend (assuming that 3.5),  $\epsilon_0$  is the permittivity of free space ( $8.85 \times 10^{-12} \text{ C V}^{-1} \text{ s}^{-1}$ ),  $\beta$  is the field activation factor and  $m$  the electron mobility.

### 3. photophysical Equation

The rate constants were determined using the following basic photophysical functions

$$\phi_{PF} = \phi_{PL} R_{prompt} \quad (\text{S1})$$

$$\phi_{DF} = \phi_{PL} R_{delayed} \quad (\text{S2})$$

$$k_r^s = \phi_{PF} / \tau_{PF} \quad (\text{S3})$$

$$\phi_{PL} = k_r^s / (k_r^s + k_{nr}^s) \quad (\text{S4})$$

$$\phi_{PF} = k_r^s / (k_r^s + k_{nr}^s + k_{ISC}) \quad (\text{S5})$$

$$\phi_{ISC} = k_{ISC} / (k_r^s + k_{nr}^s + k_{ISC}) \quad (\text{S6})$$

$$\phi_{hRISC} = \phi_{DF} / \phi_{ISC} \quad (\text{S7})$$

$$k_{hISC} = \phi_{hRISC} (k_{hRISC} + k_{IC}^{Tn}) \quad (\text{S8})$$

$$k_{PF} = 1 / \tau_{PF} \quad (\text{S9})$$

$$k_{DF} = 1 / \tau_{DF} \quad (\text{S10})$$

here  $\phi_{PL}$  is the photoluminescence quantum yield (PLQY).  $\phi_{PF}$  and  $\phi_{DF}$  are the prompt and delayed fluorescence efficiencies, respectively.  $\phi_{ISC}$  and  $\phi_{hRISC}$  are the ISC and  $hRISC$  efficiencies, respectively.  $\tau_{PF}$  and  $\tau_{DF}$  are the prompt and delayed fluorescent lifetimes, respectively.  $k_r^s$ ,  $k_{nr}^s$ ,  $k_{ISC}$ ,  $k_{hRISC}$ ,  $k_{IC}^{Tn}$ ,  $k_{PF}$  and  $k_{DF}$  are the rates of singlet radiation, singlet non-radiation, ISC,  $hRISC$ , IC from  $T_n$  to  $T_1$ , prompt fluorescence and decay fluorescence processes, respectively.  $R_{prompt}$  and  $R_{delayed}$  are the component ratios of prompt and delayed fluorescence, respectively.

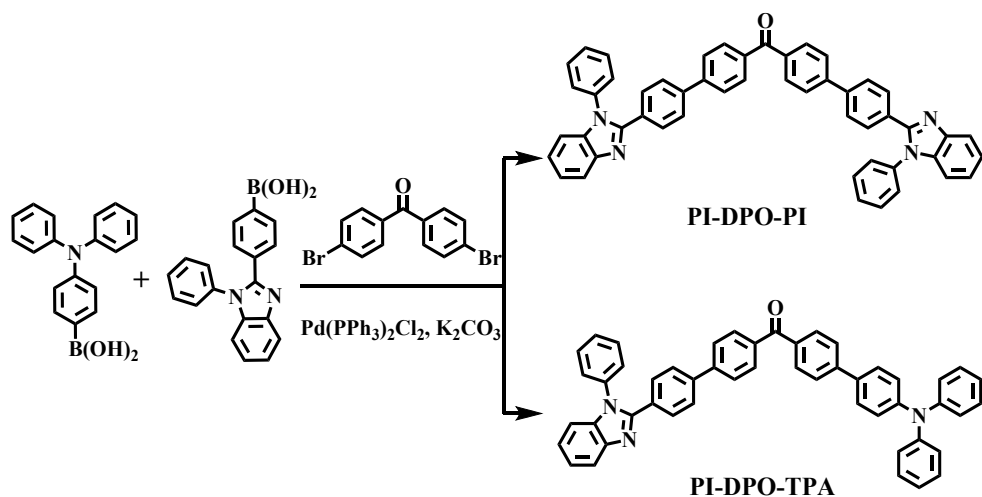

**Figure S1** The synthetic route of PI-DPO-TPA and PI-DPO-PI

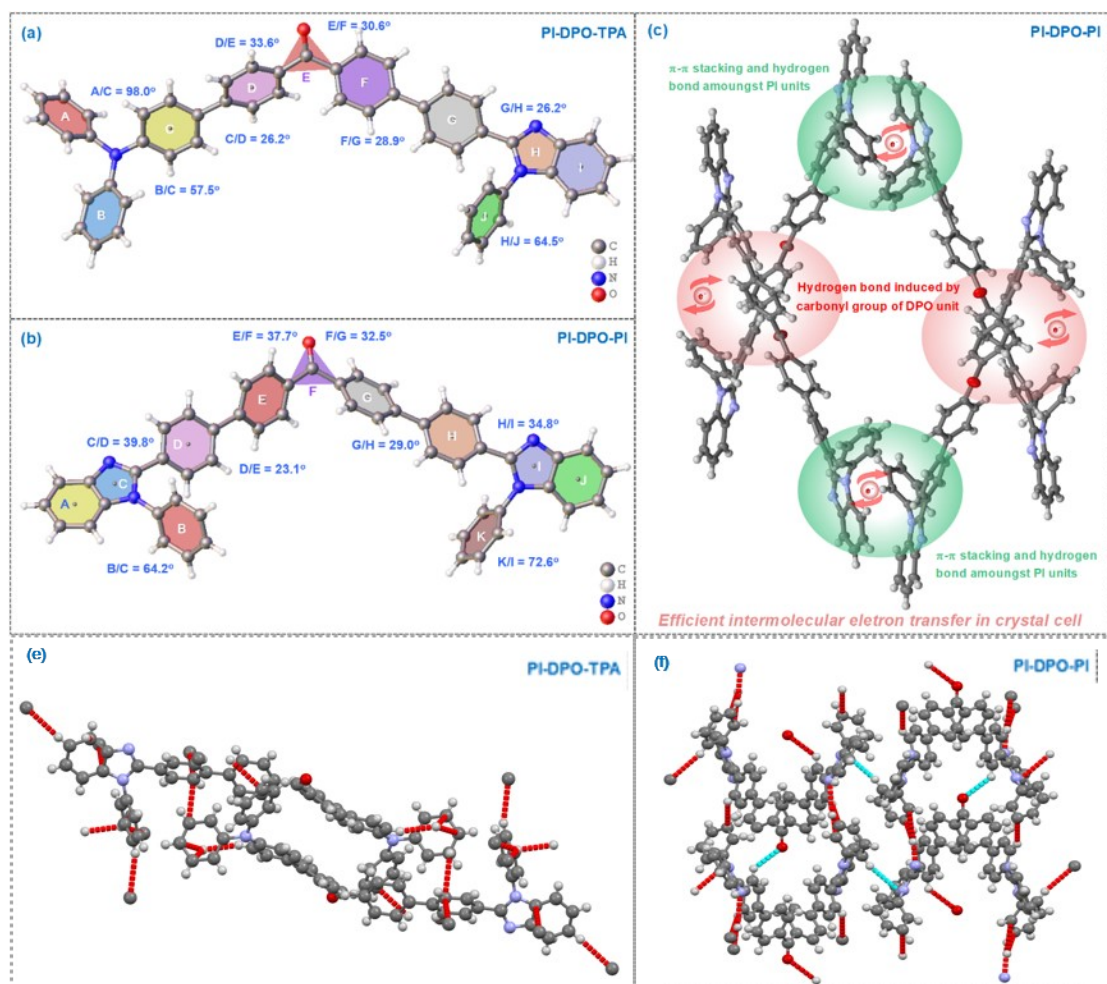

**Figure S2** Torsion angle of (a) PI-DPO-TPA, (b) PI-DPO-PI in crystal cell, (c) the lattice conformation of PI-DPO-PI, (e) packing structure and multiple interactions of PI-DPO-TPA, and (f) packing structure and multiple interactions of PI-DPO-PI.

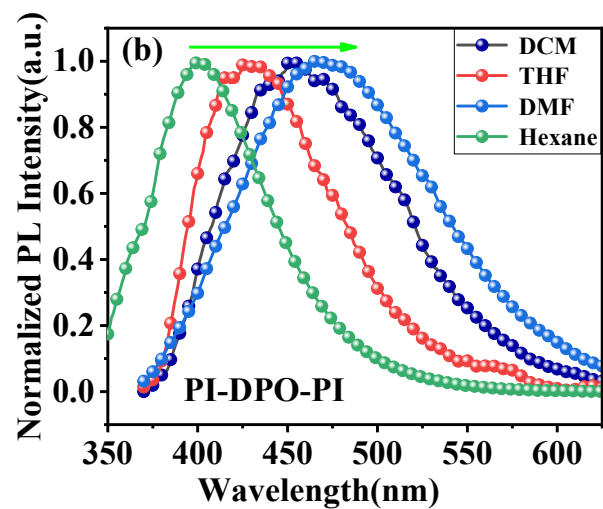

Figure S3 The emission of PI-DPO-PI in different solvents

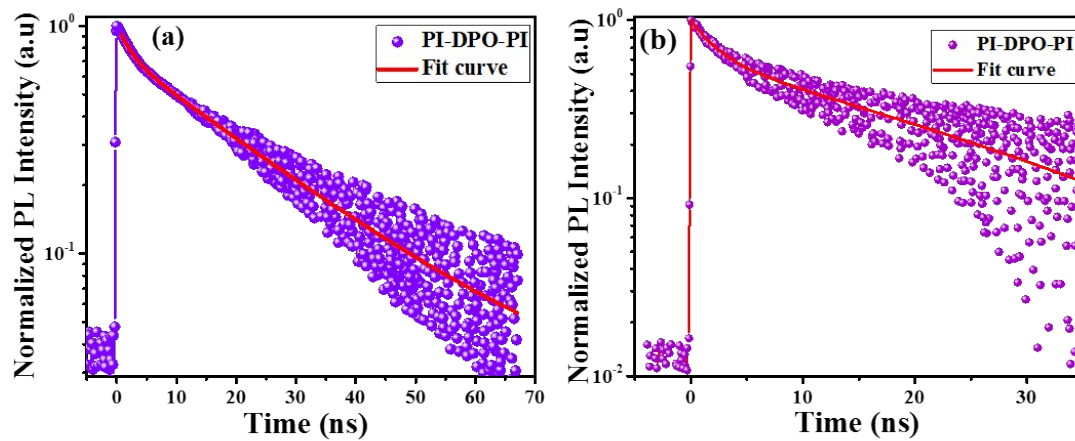

Figure S4 The fluorescent decay of PI-DPO-TPA and PI-DPO-PI in neat film

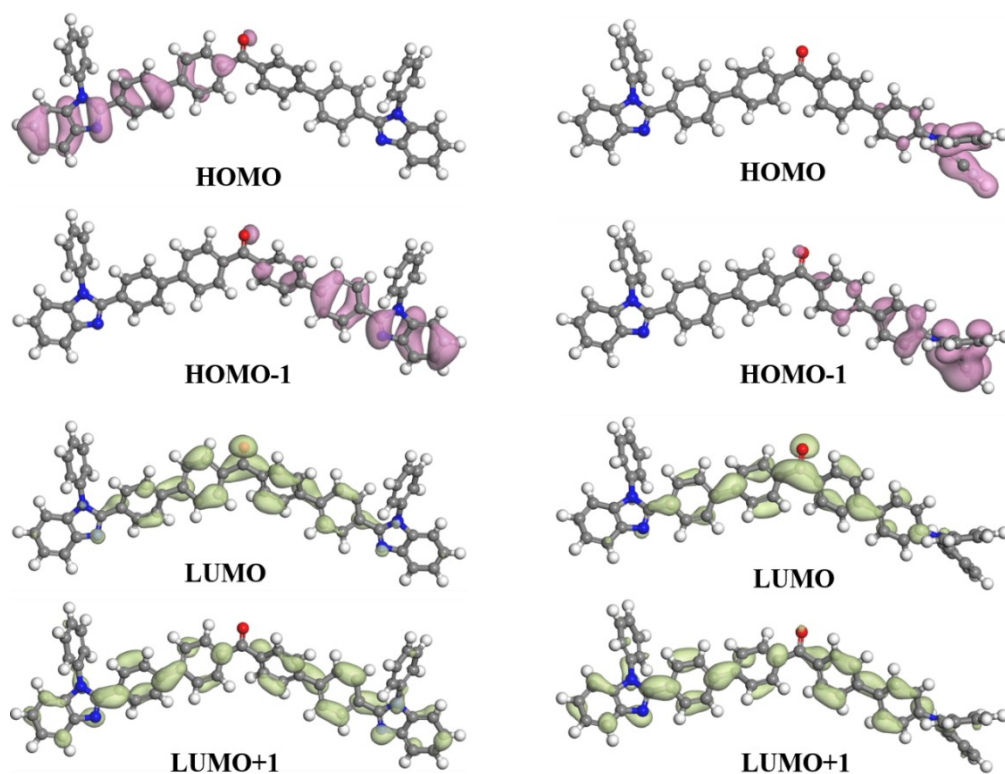

**Figure S5** The densities of HOMOs and LUMOs of PI-DPO-TPA and PI-DPO-PI

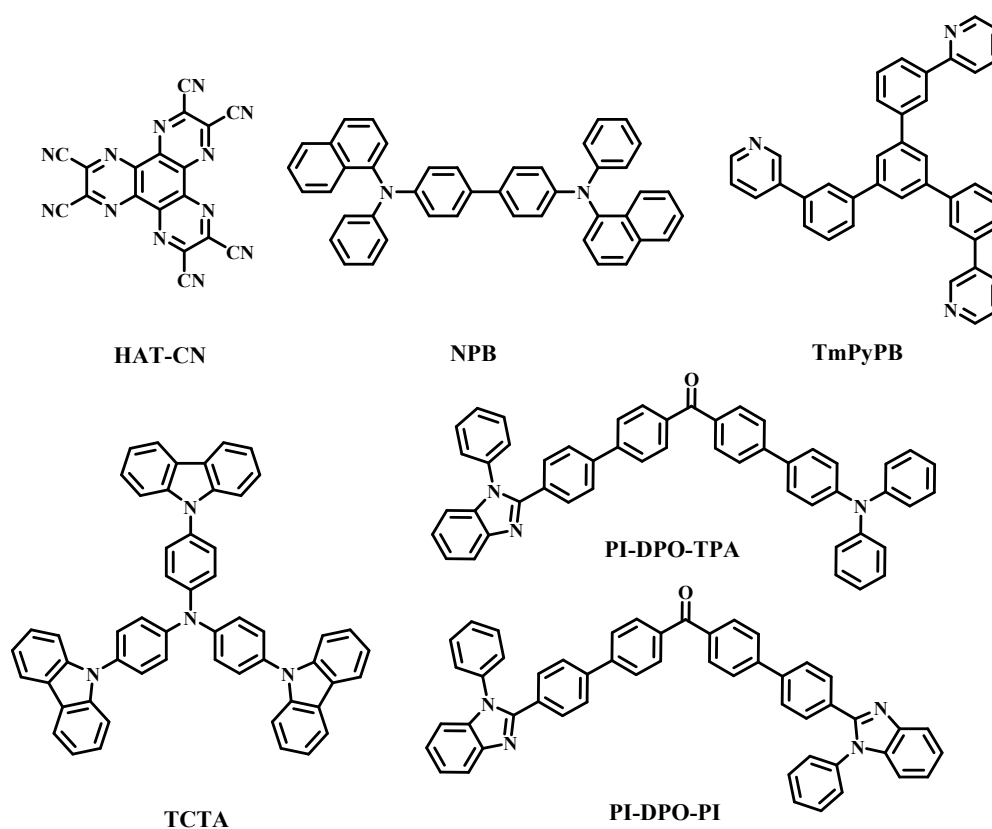

**Figure S6** The chemical structures of the involved materials for the electroluminescent devices

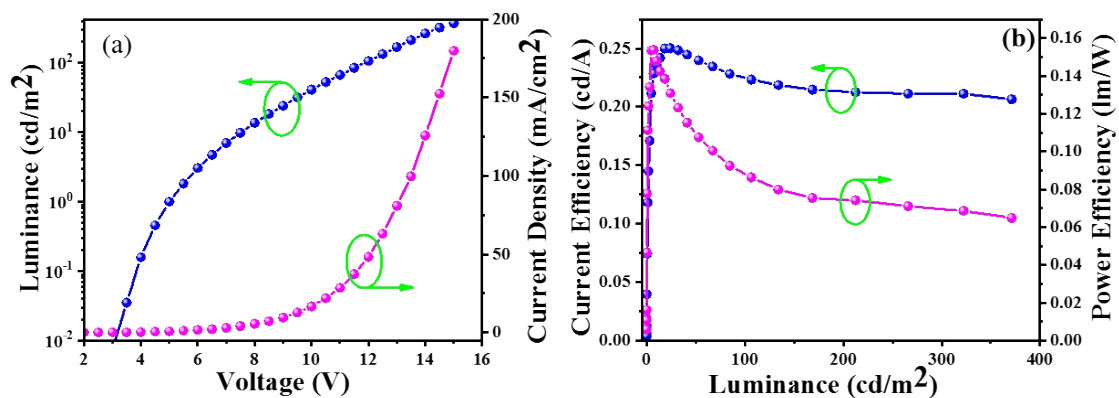

**Figure S7** The device performance by using PI-DPO-PI as emitter and PI-DPO-TPA as EMT

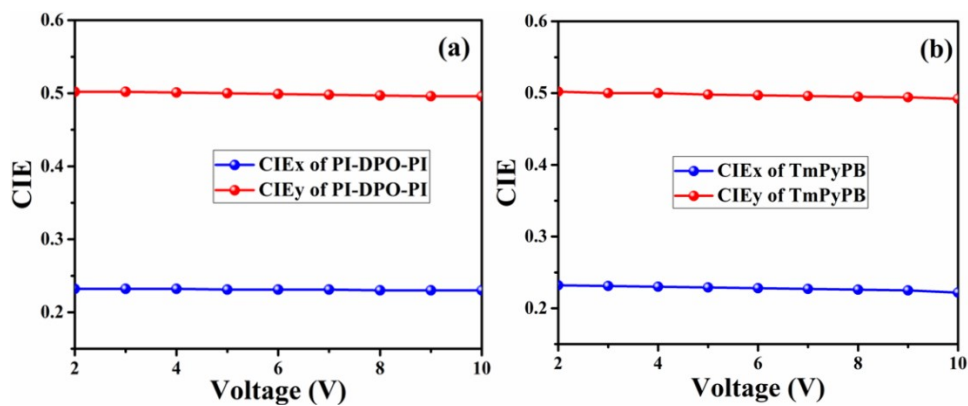

**Figure S8** The CIE coordinates deviation of EL spectra in response to the voltage change of PI-DPO-PI and TmPyPB devices

**Table S1.** Crystal data and structure refinement for PI-DPO-TPA

| Compound                                    | PI-DPO-TPA                                        |
|---------------------------------------------|---------------------------------------------------|
| Empirical formula                           | C <sub>50</sub> H <sub>35</sub> N <sub>3</sub> O  |
| Formula weight                              | 693.81                                            |
| Temperature/K                               | 296(2)                                            |
| Crystal system                              | triclinic                                         |
| Space group                                 | P-1                                               |
| a/Å                                         | 9.8097(19)                                        |
| b/Å                                         | 9.863(2)                                          |
| c/Å                                         | 19.713(4)                                         |
| $\alpha$ /°                                 | 88.450                                            |
| $\beta$ /°                                  | 78.609                                            |
| $\gamma$ /°                                 | 80.356                                            |
| Volume/Å <sup>3</sup>                       | 1843.3(6)                                         |
| Z                                           | 2                                                 |
| $\rho_{\text{calc}}$ /cm <sup>3</sup>       | 1.250                                             |
| $\mu$ /mm <sup>-1</sup>                     | 0.075                                             |
| F(000)                                      | 728                                               |
| Crystal size/mm <sup>3</sup>                | 0.21 × 0.18 × 0.16                                |
| Radiation                                   | Mo K $\alpha$ ( $\lambda$ = 0.71073)              |
| Index ranges                                | -12 ≤ h ≤ 8, -12 ≤ k ≤ 12, -24 ≤ l ≤ 25           |
| Reflections collected                       | 11630                                             |
| Goodness-of-fit on F <sup>2</sup>           | 0.965                                             |
| Final R indexes [ $I \geq 2\sigma(I)$ ]     | R <sub>1</sub> = 0.0609, wR <sub>2</sub> = 0.1355 |
| Final R indexes [all data]                  | R <sub>1</sub> = 0.1393, wR <sub>2</sub> = 0.1072 |
| Largest diff. peak/hole / e Å <sup>-3</sup> | 0.001/0.0                                         |

**Table S2.** Crystal data and structure refinement for PI-DPO-PI

| Compound                                    | PI-DPO-PI                                         |
|---------------------------------------------|---------------------------------------------------|
| Empirical formula                           | C <sub>54</sub> H <sub>34</sub> N <sub>4</sub> O  |
| Formula weight                              | 754.85                                            |
| Temperature/K                               | 296(2)                                            |
| Crystal system                              | monoclinic                                        |
| Space group                                 | P21/n                                             |
| a/Å                                         | 10.674(5)                                         |
| b/Å                                         | 23.048(10)                                        |
| c/Å                                         | 17.005(7)                                         |
| α/°                                         | 90                                                |
| β/°                                         | 91.185(5)                                         |
| γ/°                                         | 90                                                |
| Volume/Å <sup>3</sup>                       | 4182(3)                                           |
| Z                                           | 4                                                 |
| ρ <sub>calc</sub> /g/cm <sup>3</sup>        | 1.199                                             |
| μ/mm <sup>-1</sup>                          | 0.072                                             |
| F(000)                                      | 1576                                              |
| Crystal size/mm <sup>3</sup>                | 0.19 × 0.17 × 0.15                                |
| Radiation                                   | Mo Kα (λ = 0.71073)                               |
| Index ranges                                | -13 ≤ h ≤ 13, -29 ≤ k ≤ 18, -21 ≤ l ≤ 22          |
| Reflections collected                       | 9528                                              |
| Goodness-of-fit on F <sup>2</sup>           | 0.957                                             |
| Final R indexes [I ≥ 2σ (I)]                | R <sub>1</sub> = 0.0616, wR <sub>2</sub> = 0.1457 |
| Final R indexes [all data]                  | R <sub>1</sub> = 0.1595, wR <sub>2</sub> = 0.1862 |
| Largest diff. peak/hole / e Å <sup>-3</sup> | 0.0/-0.0                                          |



**Table S3.** Photophysical property of the neat PI-DPO-TPA and PI-DPO-PI films

| compounds  | $\phi_{PL}$<br>[%] | $\tau_{PF}$<br>[ns] | $\tau_{DF}$<br>[ns] | $k_{PF}$<br>[ $10^8 \text{ s}^{-1}$ ] | $k_{DF}$<br>[ $10^8 \text{ s}^{-1}$ ] | $k_{ISC}$<br>[ $10^8 \text{ s}^{-1}$ ] | $k_{hRISC}$<br>[ $10^8 \text{ s}^{-1}$ ] | $k_r^s$<br>[ $10^8 \text{ s}^{-1}$ ] | $k_{nr}^s$<br>[ $10^8 \text{ s}^{-1}$ ] | $k_{IC}^{Tn}$<br>[ $10^8 \text{ s}^{-1}$ ] | $\phi_{ISC}$<br>[%] | $\phi_{hRISC}$<br>[%] | $\phi_{hRISC}/\phi_{ISC}$ |
|------------|--------------------|---------------------|---------------------|---------------------------------------|---------------------------------------|----------------------------------------|------------------------------------------|--------------------------------------|-----------------------------------------|--------------------------------------------|---------------------|-----------------------|---------------------------|
| PI-DPO-TPA | 60.6               | 2.19                | 22.1                | 4.57                                  | 0.45                                  | 2.83                                   | 1.18                                     | 1.05                                 | 0.68                                    | 1.89                                       | 61                  | 61                    | 1.0                       |
| PI-DPO-PI  | 5.2                | 2.26                | 26.81               | 4.42                                  | 0.37                                  | 2.50                                   | 0.83                                     | 0.11                                 | 2.02                                    | 1.05                                       | 54                  | 54                    | 1.0                       |

**Table S4.** Comparison on device performance of different emitters with hot-exciton characterization

| Light color | Emitters      | V <sub>on</sub> (V) | EQE (%) | PE (lm/w) | CE (cd/A) | Literatures |
|-------------|---------------|---------------------|---------|-----------|-----------|-------------|
| Green       | PI-DPO-TPA    | 2.0                 | 8.45    | 16.91     | 18.87     | This work   |
|             | CzP-BZP       | 4.0                 | 6.95    | 16.38     | 23.99     | [1]         |
|             | CADPPI        | 2.8                 | 4.78    | 10.84     | 9.85      | [2]         |
|             | DPIAPPB       | 2.8                 | 4.15    | 6.16      | 6.56      |             |
|             | Emitter 1     | 4.1                 | 7.0     | 14.5      | 23.1      | [3]         |
|             | Emitter 2     | 4.2                 | 8.1     | 15.6      | 24.9      |             |
|             | 2EHO-TPA-CNPE | 3.5                 | 5.5     | 5.4       | 6.1       | [4]         |
| Blue        | MPPIS-Cz      | 5.2                 | 1.48    | 1.30      | 1.52      | [5]         |
|             | MPPIS-TPA     | 6.1                 | 1.34    | 1.28      | 1.46      |             |
|             | PABP          | 4.1                 | 6.31    | 4.65      | 5.85      | [6]         |
|             | PAIDO         | 3.7                 | 8.82    | 7.27      | 7.64      |             |
| Red         | TPPI-BZPCN    | 2.8                 | 3.33    | 4.28      | 7.60      | [7]         |

**Table S5.** Comparison on device performance of ITO/HAT-CN/NPB/TCTA/emitters/ETMs/LiF/Al with different ETMs

| Emitter/ETMs                | V <sub>on</sub> (V) | EQE (%) | PE (lm/w) | CE (cd/A) | Literatures |
|-----------------------------|---------------------|---------|-----------|-----------|-------------|
| PI-DPO-TPA/PI-DPO-PI        | 2.0                 | 8.45    | 16.91     | 18.87     | This work   |
| PI-DPO-TPA/TmPyPB           | 4.5                 | 4.20    | 4.02      | 12.32     | This work   |
| TPA-SO <sub>2</sub> /TPBi   | 2.7                 | 3.91    | 5.46      | 5.26      | [8]         |
| DPAC-TAn-BI/TmPyPB          | 3.0                 | 5.81    | 6.78      | 6.48      | [9]         |
| TPB-PAPC/TmPyPB             | 2.5                 | 6.00    | 4.20      | 4.10      | [10]        |
| PAC/TPBi                    | 4.4                 | 10.03   | 6.94      | 12.37     | [11]        |
| CDE1/B3PYMPM                | 4.3                 | 5.20    | 5.00      | 15.00     | [12]        |
| SBDBQ-PXZ/Bephen            | 2.4                 | 5.60    | 10.50     | 12.00     | [13]        |
| o-ACSO <sub>2</sub> /TmPyPB | 5.2                 | 5.90    | 7.80      | 14.10     | [14]        |
| DCPDAPM/TmPyPB              | 6.1                 | 1.34    | 1.28      | 1.46      | [15]        |

## References

- [1] C. Wang, X.L. Li, Y.Y. Pan, S.T. Zhang, L. Yao, Q. Bai, W.J. Li, P. Lu, B. Yang, S.J. Su, Y.G. Ma, *ACS. Appl. Mater. Interface* **2016**, 8, 3041-3049.
- [2] J. Jayabharathi, V. Thanikachalam, R. Ramya, S. Panimozhi, *RSC. Adv.* **2019**, 9, 33693-33709.
- [3] I. Bala, R.A.K. Yadav, M. Devi, J. De, N. Singh, K. Kailasam, J. Jayakumar, J.H. Jou, C.H. Cheng, S.K. Pal, *J. Mater. Chem. C* **2020**, 8, 17009-17015.
- [4] H. Usta, D. Alimli, R. Ozdemir, E. Tekin, F. Alkan, R. Kacar, A.G. Altas, S. Dabak, A.G. Gurek, E. Mutlugun, A.F. Yazici, A. Can, *J. Mater. Chem. C* **2020**, 8, 8047-8060.
- [5] V. Thanikachalam, P. Jeeva, J. Jayabharathi, *RSC. Adv.* **2017**, 22, 13604-13614.
- [6] Y. Xu, C. Wang, X. Zhou, J. Zhou, X. Guo, X. Liang, D. Hu, F. Li, D. Ma, Y. Ma, *J. Phys. Chem. Lett.* **2019**, 10, 6878-6884.
- [7] C. Du, F. Liu, H. Liu, X. He, D. Jiang, Z. Feng, L. Gao, P. Lu, *J. Mater. Chem. C* **2020**, 8, 14446-14452.
- [8] Y. C. Li, Z. H. Wang, X. L. Li, G. Z. Xie, D. C. Chen, Y.-F. Wang, C.-C. Lo, A. Lien, J. B. Peng, Y. Cao, S.-J. Su, *Chem. Mater.* **2015**, 27, 1100-1109.
- [9] Z. L. Wu, X. Y. Zhu, Y. H. Li, H. Chen, Z. Y. Zhuang, P. C. Shen, J. J. Zeng, J. J. Chi, D. G. Ma, Z. J. Zhao, B. Z. Tang, *Adv. Opt. Mater.* **2021**, 9, 202100298.
- [10] C. W. Lin, P. B. Han, S. Xiao, F. L. Qu, J. W. Yao, X. F. Qiao, D. Z. Yang, Y. F. Dai, Q. Sun, D. H. Hu, A. J. Qin, Y. G. Ma, B. Z. Tang, D. G. Ma, *Adv. Funct. Mater.* **2021**, 31, 202106912.
- [11] Y. Xu, X. Liang, X. Zhou, P. Yuan, J. Zhou, C. Wang, B. Li, D. Hu, X. Qiao, X. Jiang, L. Liu, S. J. Su, D. Ma, Y. Ma, *Adv. Mater.* **2019**, 31, 1807388.
- [12] Y. Li, G. Xie, S. Gong, K. Wu, C. Yang, *Chem. Sci.* **2016**, 7, 5441.
- [13] L. Yu, Z. Wu, G. Xie, W. Zeng, D. Ma, C. Yang, *Chem. Sci.* **2018**, 9, 1385.
- [14] K. Wu, Z. Wang, L. Zhan, C. Zhong, S. Gong, G. Xie, C. Yang, *J. Phys. Chem. Lett.* **2018**, 9, 1547.
- [15] Y. Zhao, W. Wang, C. Gui, L. Fang, X. Zhang, S. Wang, S. Chen, H. Shi, B. Z. Tang, *J. Mater. Chem. C* **2018**, 6, 2873.
